# Supplementary material for: Influence of the chemical structure of diisocyanate on the electrical and thermal properties of in situ polymerized polyurethane–graphene composite films
Source: Royal Society of Chemistry journal article supplement (doi:10.1039/d2cp03826a), 2022-01-01
Supplement: d2cp03826a1.pdf [file d2cp03826a1.pdf]

## Supplementary information

Further details of mechanical properties of HDI-PU/G are given in S1, and table 1 respectively. Mechanical properties of the sample were measured by a universal tensile testing machine (TB5T). The extension rate was 5 mm/min, and load cell was 100 N. Sample was cut and prepared as an ASTM E8M-04 standard (sub-size specimen) and then tested.

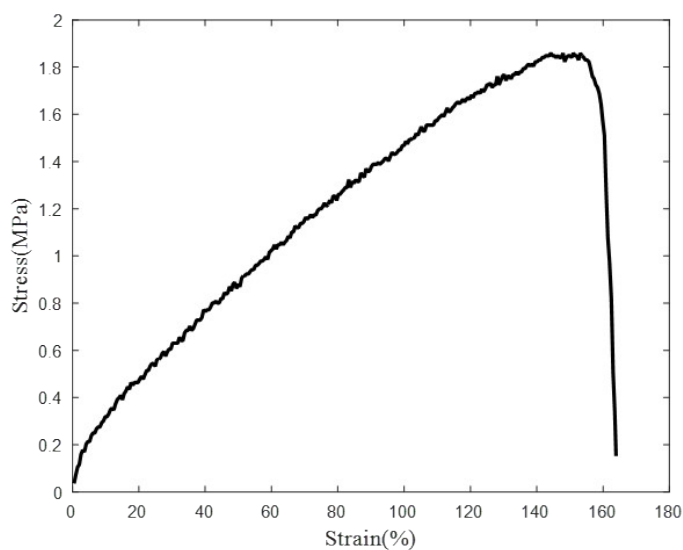

*S 1. Stress-strain curve of HDI-PU/G*

*Table 1 Value of mechanical properties from tensile test of HDI-PU/G*

| sample   | Tensile stress (MPa) | Young's modulus (MPa) | Strain % |
|----------|----------------------|-----------------------|----------|
| PU/G HDI | 1.83                 | 1                     | 154.7    |
